# Supplementary material for: Population Pharmacokinetics/Pharmacodynamics of 3,4‐Diaminopyridine Free Base in Patients With Lambert‐Eaton Myasthenia
Source: PubMed Central journal article supplement — CPT Pharmacometrics Syst Pharmacol. 2017 Jul 24;6(9):625–34. doi: 10.1002/psp4.12218 (PMC5613184; doi:10.1002/psp4.12218), 2017-07-24
Supplement: PSP4-6-625-s001.pdf [file PSP4-6-625-s001.pdf]

**Supplementary Figure S1.** Schematic representation of overall study design.

**A.**

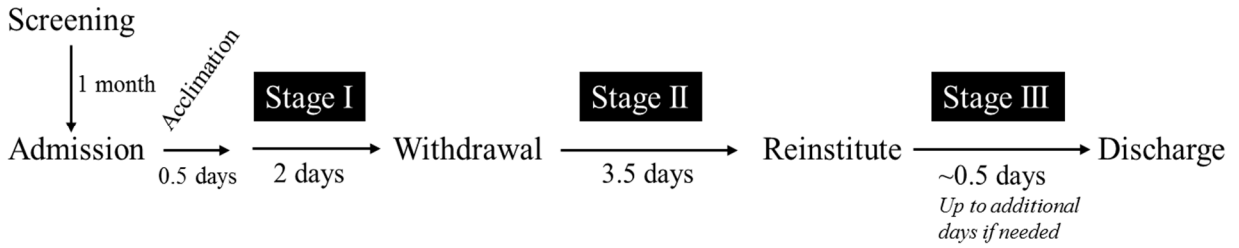

**B.**

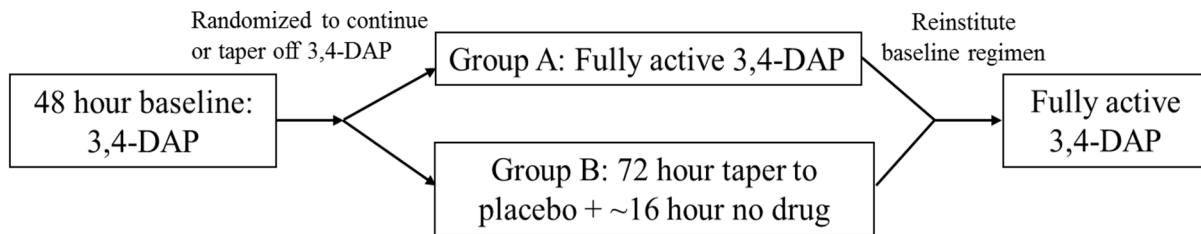

**A.** Different stages of the DAPPER trial. **B.** Patients were randomized to either Group A (continue active 3,4-DAP) or Group B (withdrawal of 3,4-DAP).
