# Supplementary material for: Population Pharmacokinetics/Pharmacodynamics of 3,4‐Diaminopyridine Free Base in Patients With Lambert‐Eaton Myasthenia
Source: PubMed Central journal article supplement — CPT Pharmacometrics Syst Pharmacol. 2017 Jul 24;6(9):625–34. doi: 10.1002/psp4.12218 (PMC5613184; doi:10.1002/psp4.12218), 2017-07-24

**Supplementary Figure S4.** Simulated percent change in sustained 3TUG from baseline for 20 mg four times daily dosing regimen.

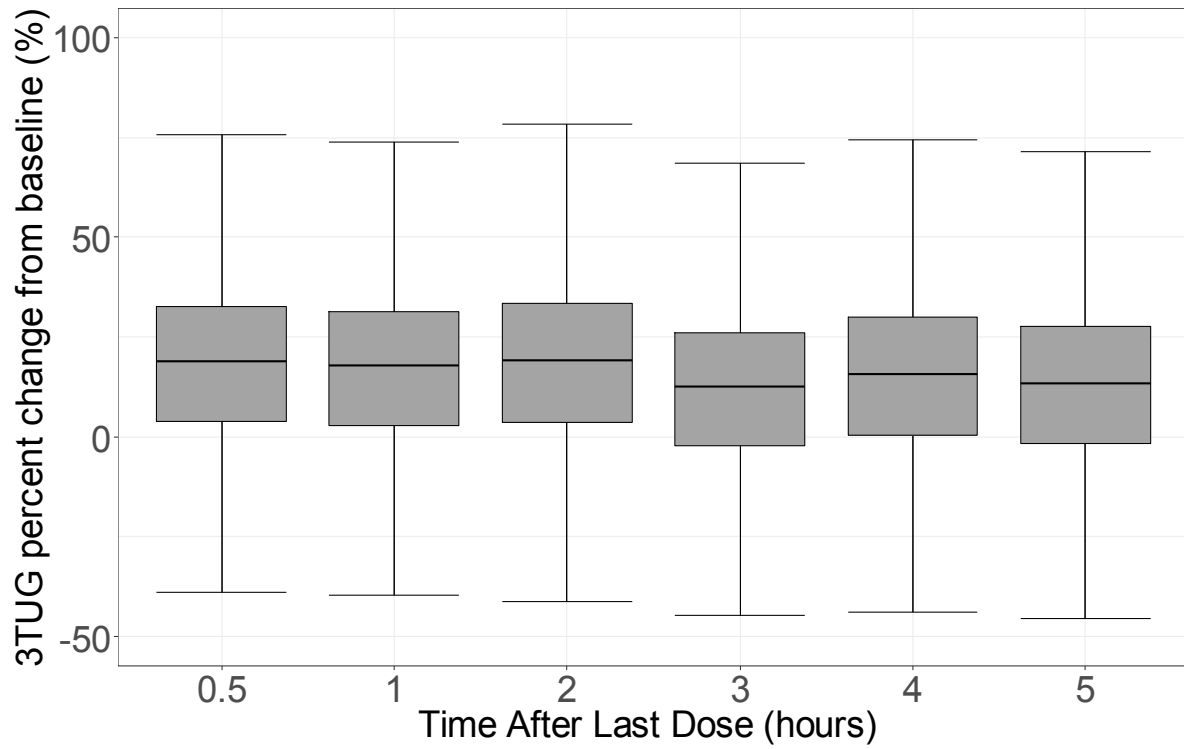

Supplement: PSP4-6-625-s004.pdf [file PSP4-6-625-s004.pdf]
